# Supplementary material for: Priority of Treatment Outcomes for Caregivers and Patients with Mild Cognitive Impairment: Preliminary Analyses
Source: Springer Nature journal article supplement (doi:10.1007/s40120-016-0049-1), 2016-08-09
Supplement: MOESM1 [file 10568156]

**Supplementary material**

S1

Interview script:. “The HABIT team assesses a variety of outcomes in the program. You filled out forms about those outcomes before and after the program. You have received those forms periodically since then. I am going to ask you about those outcomes. Having gone through HABIT, which areas were most important to you?"

[Randomly select two outcome areas ‘A’ and ‘B’] ”Let’s begin by considering if it is more important that HABIT helps you with ‘A’ or with ‘B’?”

[After these two were rank ordered select another outcome area ‘F’] “ Now consider ‘F’, is it more important that HABIT helps you with ‘F’ or ‘A’? How about ‘F’ versus ‘B’?’ [Select another and determine where it rankes beginning in the middle of the rank order and proceed up or down the rankings until all of the outcomes’ relative importance is determined].

S2

Outcomes Survey: What do you most want HABIT to help with?

In HABIT we call the person with MCI the participant and their loved one the partner. This table lists the focus and name of each outcome measure we use. The table provides an example of questions asked on each measure. Please rank order the importance of these outcomes to you. Rank them from 1=most important to 12=least important, use each number once and only once. Consider all outcome together not separately for participant and partner.

| **Outcomes**  about Participant | **Title** | **Example of question** | **Rank** |
| --- | --- | --- | --- |
| Mood (Depression) | CES-D | I felt depressed |  |
| Quality of life | Quality of life | Life as whole |  |
| Self-efficacy | Self-efficacy in Mild Cognitive Impairment | How confident are you that you can get your errands done despite your memory/cognitive difficulties |  |
| Function | Functional Assessment Questionnaire | Functioning outside familiar environments |  |
| Anxiety | Reach | I was worried |  |
| Memory-based activities of daily living | ECOG | Things that happened recently |  |
| **Outcomes**  About Partner | **Title** | **Example of question** | **Rank** |
| Burden | Zarit Burden | Do you feel that your relative asks for more help than he/she needs? |  |
| Distressing behaviors | The Neuropsychiatric Inventory | Agitation/Aggression |  |
| Self-efficacy | Pearlin Mastery | I can do just about anything if I really set my mind to it |  |
| Anxiety | Reach | I was worried |  |
| Mood (Depression) | CES-D | I felt depressed |  |
| Quality of life | Quality of life | Life as whole |  |
